# Supplementary material for: Bacteria are a major determinant of Orsay virus transmission and infection in Caenorhabditis elegans
Source: eLife. 2024 Jul 11;12:RP92534. doi: 10.7554/eLife.92534 (PMC11239179; doi:10.7554/eLife.92534)
Supplement: Source data 1. [file elife-92534-data1.xlsx]

## Sheet: Figure1C
Strain	Plate	Treatment	Time	GFP.Pos	GFP.Neg	Experiment
ZD2611	1	BIGb0172	24	128	19	1
ZD2611	2	BIGb0172	24	157	33	1
ZD2611	3	BIGb0172	24	154	21	1
ZD2611	4	BIGb0172	24	83	94	1
ZD2611	5	BIGb0172	24	116	62	1
ZD2611	1	BIGb0393	24	50	98	1
ZD2611	2	BIGb0393	24	33	115	1
ZD2611	3	BIGb0393	24	110	66	1
ZD2611	4	BIGb0393	24	83	100	1
ZD2611	5	BIGb0393	24	59	117	1
ZD2611	1	JUb24	24	73	68	1
ZD2611	2	JUb24	24	80	59	1
ZD2611	3	JUb24	24	54	102	1
ZD2611	4	JUb24	24	53	100	1
ZD2611	5	JUb24	24	87	61	1
ZD2611	1	Ochr45	24	172	4	1
ZD2611	2	Ochr45	24	134	2	1
ZD2611	3	Ochr45	24	164	6	1
ZD2611	4	Ochr45	24	102	12	1
ZD2611	5	Ochr45	24	135	22	1
ZD2611	1	OP50	24	48	74	1
ZD2611	2	OP50	24	20	101	1
ZD2611	3	OP50	24	104	42	1
ZD2611	4	OP50	24	10	116	1
ZD2611	5	OP50	24	NA	NA	1
ZD2611	1	MYb71	24	138	12	1
ZD2611	2	MYb71	24	114	14	1
ZD2611	3	MYb71	24	124	5	1
ZD2611	4	MYb71	24	113	24	1
ZD2611	5	MYb71	24	142	2	1
ZD2611	1	JUb39	24	54	79	1
ZD2611	2	JUb39	24	68	83	1
ZD2611	3	JUb39	24	33	150	1
ZD2611	4	JUb39	24	129	29	1
ZD2611	5	JUb39	24	73	29	1
ZD2611	1	MSPm1	24	18	111	1
ZD2611	2	MSPm1	24	48	88	1
ZD2611	3	MSPm1	24	101	65	1
ZD2611	4	MSPm1	24	NA	NA	1
ZD2611	5	MSPm1	24	81	40	1
ZD2611	1	MYb11	24	16	117	1
ZD2611	2	MYb11	24	16	127	1
ZD2611	3	MYb11	24	NA	NA	1
ZD2611	4	MYb11	24	10	126	1
ZD2611	5	MYb11	24	6	114	1
ZD2611	1	JUb268	24	23	73	1
ZD2611	2	JUb268	24	71	52	1
ZD2611	3	JUb268	24	38	95	1
ZD2611	4	JUb268	24	71	39	1
ZD2611	5	JUb268	24	81	40	1
ZD2611	1	CEN2ent1	24	64	54	1
ZD2611	2	CEN2ent1	24	42	87	1
ZD2611	3	CEN2ent1	24	51	58	1
ZD2611	4	CEN2ent1	24	55	82	1
ZD2611	5	CEN2ent1	24	NA	NA	1
ZD2611	1	JUb66	24	61	86	1
ZD2611	2	JUb66	24	27	89	1
ZD2611	3	JUb66	24	72	91	1
ZD2611	4	JUb66	24	84	57	1
ZD2611	5	JUb66	24	58	114	1
ZD2611	1	OP50	24	29	70	2
ZD2611	2	OP50	24	59	42	2
ZD2611	3	OP50	24	59	55	2
ZD2611	4	OP50	24	37	60	2
ZD2611	5	OP50	24	31	88	2
ZD2611	1	MYb71	24	100	0	2
ZD2611	2	MYb71	24	83	1	2
ZD2611	3	MYb71	24	105	1	2
ZD2611	4	MYb71	24	91	0	2
ZD2611	5	MYb71	24	33	45	2
ZD2611	1	Ochr45	24	92	0	2
ZD2611	2	Ochr45	24	138	0	2
ZD2611	3	Ochr45	24	81	0	2
ZD2611	4	Ochr45	24	99	2	2
ZD2611	5	Ochr45	24	113	1	2
ZD2611	1	JUb39	24	35	91	2
ZD2611	2	JUb39	24	89	44	2
ZD2611	3	JUb39	24	24	75	2
ZD2611	4	JUb39	24	69	40	2
ZD2611	5	JUb39	24	66	35	2
ZD2611	1	JUb24	24	8	99	2
ZD2611	2	JUb24	24	8	80	2
ZD2611	3	JUb24	24	55	71	2
ZD2611	4	JUb24	24	27	71	2
ZD2611	5	JUb24	24	24	69	2
ZD2611	1	JUb268	24	55	31	2
ZD2611	2	JUb268	24	8	85	2
ZD2611	3	JUb268	24	46	72	2
ZD2611	4	JUb268	24	62	77	2
ZD2611	5	JUb268	24	18	69	2
ZD2611	1	CEN2ent1	24	74	37	2
ZD2611	2	CEN2ent1	24	19	80	2
ZD2611	3	CEN2ent1	24	70	30	2
ZD2611	4	CEN2ent1	24	68	40	2
ZD2611	5	CEN2ent1	24	70	40	2
ZD2611	1	JUb66	24	77	58	2
ZD2611	2	JUb66	24	52	52	2
ZD2611	3	JUb66	24	28	98	2
ZD2611	4	JUb66	24	37	60	2
ZD2611	5	JUb66	24	19	75	2
ZD2611	1	BIGb0172	24	76	64	2
ZD2611	2	BIGb0172	24	110	8	2
ZD2611	3	BIGb0172	24	63	42	2
ZD2611	4	BIGb0172	24	77	34	2
ZD2611	5	BIGb0172	24	97	13	2
ZD2611	1	BIGb0393	24	57	47	2
ZD2611	2	BIGb0393	24	30	61	2
ZD2611	3	BIGb0393	24	30	57	2
ZD2611	4	BIGb0393	24	13	92	2
ZD2611	5	BIGb0393	24	32	52	2
ZD2611	1	MSPm1	24	9	57	2
ZD2611	2	MSPm1	24	19	56	2
ZD2611	3	MSPm1	24	NA	NA	2
ZD2611	4	MSPm1	24	22	29	2
ZD2611	5	MSPm1	24	12	30	2
ZD2611	1	MYb11	24	10	81	2
ZD2611	2	MYb11	24	21	68	2
ZD2611	3	MYb11	24	19	93	2
ZD2611	4	MYb11	24	15	90	2
ZD2611	5	MYb11	24	4	93	2
ZD2611	1	OP50	24	28	59	3
ZD2611	2	OP50	24	44	73	3
ZD2611	3	OP50	24	18	63	3
ZD2611	4	OP50	24	51	45	3
ZD2611	5	OP50	24	15	66	3
ZD2611	1	MYb71	24	69	14	3
ZD2611	2	MYb71	24	85	23	3
ZD2611	3	MYb71	24	122	6	3
ZD2611	4	MYb71	24	112	15	3
ZD2611	5	MYb71	24	94	2	3
ZD2611	1	Ochr45	24	74	0	3
ZD2611	2	Ochr45	24	107	3	3
ZD2611	3	Ochr45	24	106	4	3
ZD2611	4	Ochr45	24	97	4	3
ZD2611	5	Ochr45	24	66	1	3
ZD2611	1	JUb39	24	95	18	3
ZD2611	2	JUb39	24	NA	NA	3
ZD2611	3	JUb39	24	NA	NA	3
ZD2611	4	JUb39	24	74	48	3
ZD2611	5	JUb39	24	79	73	3
ZD2611	1	JUb24	24	19	89	3
ZD2611	2	JUb24	24	20	76	3
ZD2611	3	JUb24	24	32	96	3
ZD2611	4	JUb24	24	19	104	3
ZD2611	5	JUb24	24	15	99	3
ZD2611	1	JUb268	24	7	88	3
ZD2611	2	JUb268	24	18	69	3
ZD2611	3	JUb268	24	38	50	3
ZD2611	4	JUb268	24	19	68	3
ZD2611	5	JUb268	24	32	51	3
ZD2611	1	CEN2ent1	24	17	95	3
ZD2611	2	CEN2ent1	24	39	48	3
ZD2611	3	CEN2ent1	24	20	119	3
ZD2611	4	CEN2ent1	24	46	59	3
ZD2611	5	CEN2ent1	24	19	89	3
ZD2611	1	JUb66	24	10	79	3
ZD2611	2	JUb66	24	50	48	3
ZD2611	3	JUb66	24	14	104	3
ZD2611	4	JUb66	24	40	75	3
ZD2611	5	JUb66	24	15	84	3
ZD2611	1	BIGb0172	24	40	75	3
ZD2611	2	BIGb0172	24	53	60	3
ZD2611	3	BIGb0172	24	48	71	3
ZD2611	4	BIGb0172	24	50	82	3
ZD2611	5	BIGb0172	24	78	34	3
ZD2611	1	BIGb0393	24	37	61	3
ZD2611	2	BIGb0393	24	51	68	3
ZD2611	3	BIGb0393	24	8	103	3
ZD2611	4	BIGb0393	24	13	103	3
ZD2611	5	BIGb0393	24	14	90	3
ZD2611	1	MSPm1	24	NA	NA	3
ZD2611	2	MSPm1	24	43	49	3
ZD2611	3	MSPm1	24	35	86	3
ZD2611	4	MSPm1	24	NA	NA	3
ZD2611	5	MSPm1	24	NA	NA	3
ZD2611	1	MYb11	24	5	83	3
ZD2611	2	MYb11	24	8	90	3
ZD2611	3	MYb11	24	20	96	3
ZD2611	4	MYb11	24	10	101	3
ZD2611	5	MYb11	24	12	80	3

## Sheet: Figure1D
Strain	Plate	Bacteria	Dose	Time	GFP.Pos	GFP.Neg
ZD2611	1	OP50	0	24	0	18
ZD2611	2	OP50	0	24	0	11
ZD2611	3	OP50	0	24	0	34
ZD2611	1	OP50	0.1	24	1	49
ZD2611	2	OP50	0.1	24	5	95
ZD2611	3	OP50	0.1	24	6	95
ZD2611	1	OP50	0.25	24	8	39
ZD2611	2	OP50	0.25	24	10	51
ZD2611	3	OP50	0.25	24	8	49
ZD2611	1	OP50	0.5	24	25	42
ZD2611	2	OP50	0.5	24	32	55
ZD2611	3	OP50	0.5	24	10	52
ZD2611	1	OP50	1	24	33	44
ZD2611	2	OP50	1	24	40	63
ZD2611	3	OP50	1	24	19	21
ZD2611	1	OP50	2.5	24	49	14
ZD2611	2	OP50	2.5	24	54	29
ZD2611	3	OP50	2.5	24	69	24
ZD2611	1	OP50	5	24	47	7
ZD2611	2	OP50	5	24	27	5
ZD2611	3	OP50	5	24	48	5
ZD2611	1	OP50	10	24	115	6
ZD2611	2	OP50	10	24	62	7
ZD2611	3	OP50	10	24	70	7
ZD2611	1	OP50	25	24	41	1
ZD2611	2	OP50	25	24	75	3
ZD2611	3	OP50	25	24	81	6
ZD2611	1	OP50	50	24	75	0
ZD2611	2	OP50	50	24	97	1
ZD2611	3	OP50	50	24	48	1
ZD2611	1	OP50	100	24	62	3
ZD2611	2	OP50	100	24	111	7
ZD2611	3	OP50	100	24	91	0
ZD2611	1	MYb11	0	24	0	29
ZD2611	2	MYb11	0	24	0	24
ZD2611	3	MYb11	0	24	0	119
ZD2611	1	MYb11	0.1	24	0	126
ZD2611	2	MYb11	0.1	24	0	103
ZD2611	3	MYb11	0.1	24	1	122
ZD2611	1	MYb11	0.25	24	2	119
ZD2611	2	MYb11	0.25	24	1	116
ZD2611	3	MYb11	0.25	24	1	92
ZD2611	1	MYb11	0.5	24	0	114
ZD2611	2	MYb11	0.5	24	1	113
ZD2611	3	MYb11	0.5	24	2	129
ZD2611	1	MYb11	1	24	1	114
ZD2611	2	MYb11	1	24	3	67
ZD2611	3	MYb11	1	24	2	102
ZD2611	1	MYb11	2.5	24	7	102
ZD2611	2	MYb11	2.5	24	4	113
ZD2611	3	MYb11	2.5	24	2	77
ZD2611	1	MYb11	5	24	11	104
ZD2611	2	MYb11	5	24	6	61
ZD2611	3	MYb11	5	24	1	50
ZD2611	1	MYb11	10	24	9	93
ZD2611	2	MYb11	10	24	11	46
ZD2611	3	MYb11	10	24	7	81
ZD2611	1	MYb11	25	24	21	103
ZD2611	2	MYb11	25	24	18	90
ZD2611	3	MYb11	25	24	22	81
ZD2611	1	MYb11	50	24	53	50
ZD2611	2	MYb11	50	24	42	88
ZD2611	3	MYb11	50	24	27	60
ZD2611	1	MYb11	100	24	62	53
ZD2611	2	MYb11	100	24	44	47
ZD2611	3	MYb11	100	24	26	24
ZD2611	1	MYb71	0	24	0	21
ZD2611	2	MYb71	0	24	0	75
ZD2611	3	MYb71	0	24	0	30
ZD2611	1	MYb71	0.1	24	53	37
ZD2611	2	MYb71	0.1	24	45	19
ZD2611	3	MYb71	0.1	24	48	43
ZD2611	1	MYb71	0.25	24	81	26
ZD2611	2	MYb71	0.25	24	62	19
ZD2611	3	MYb71	0.25	24	77	24
ZD2611	1	MYb71	0.5	24	68	20
ZD2611	2	MYb71	0.5	24	97	16
ZD2611	3	MYb71	0.5	24	74	18
ZD2611	1	MYb71	1	24	112	3
ZD2611	2	MYb71	1	24	114	11
ZD2611	3	MYb71	1	24	77	10
ZD2611	1	MYb71	2.5	24	100	5
ZD2611	2	MYb71	2.5	24	78	6
ZD2611	3	MYb71	2.5	24	85	5
ZD2611	1	MYb71	5	24	114	4
ZD2611	2	MYb71	5	24	72	3
ZD2611	3	MYb71	5	24	67	4
ZD2611	1	MYb71	10	24	96	1
ZD2611	2	MYb71	10	24	82	6
ZD2611	3	MYb71	10	24	54	5
ZD2611	1	MYb71	25	24	116	3
ZD2611	2	MYb71	25	24	90	3
ZD2611	3	MYb71	25	24	53	0
ZD2611	1	MYb71	50	24	108	1
ZD2611	2	MYb71	50	24	105	3
ZD2611	3	MYb71	50	24	63	1
ZD2611	1	MYb71	100	24	102	2
ZD2611	2	MYb71	100	24	114	0
ZD2611	3	MYb71	100	24	41	0

## Sheet: Figure1E
Individual Experiments
Strain	ID50	RatioVSOP50	Experiment
MYb11	93.0819	82.4086	1
MYb71	0.0526594	0.0466212	1
OP50	1.12952	1	1
MYb11	299.325	78.0231	2
MYb71	0.467228	0.121789	2
OP50	3.83637	1	2
MYb11	739.792	215.121	3
MYb71	0.176796	0.0514098	3
OP50	3.43896	1	3
Mean
Strain	Ratio	ci
MYb71	0.0732734	0.104543
OP50	1	0
MYb11	125.184	193.559

## Sheet: Figure1F
Strain	Experiment	Treatment	Dose	Time	GFP.Pos	GFP.Neg
ZD2611	1	OP50	0	24	0	22
ZD2611	2	OP50	0	24	0	31
ZD2611	3	OP50	0	24	0	38
ZD2611	1	OP50	0.5	24	12	106
ZD2611	2	OP50	0.5	24	38	72
ZD2611	3	OP50	0.5	24	17	79
ZD2611	1	OP50	5	24	33	37
ZD2611	2	OP50	5	24	64	11
ZD2611	3	OP50	5	24	41	46
ZD2611	1	OP50	50	24	142	40
ZD2611	2	OP50	50	24	86	4
ZD2611	3	OP50	50	24	98	4
ZD2611	1	MYb11	0	24	0	52
ZD2611	2	MYb11	0	24	0	67
ZD2611	3	MYb11	0	24	0	75
ZD2611	1	MYb11	0.5	24	1	60
ZD2611	2	MYb11	0.5	24	1	141
ZD2611	3	MYb11	0.5	24	1	70
ZD2611	1	MYb11	5	24	3	141
ZD2611	2	MYb11	5	24	6	76
ZD2611	3	MYb11	5	24	2	72
ZD2611	1	MYb11	50	24	46	142
ZD2611	2	MYb11	50	24	56	76
ZD2611	3	MYb11	50	24	19	95
ZD2611	1	MYb71	0	24	0	41
ZD2611	2	MYb71	0	24	0	53
ZD2611	3	MYb71	0	24	0	65
ZD2611	1	MYb71	0.5	24	80	58
ZD2611	2	MYb71	0.5	24	82	14
ZD2611	3	MYb71	0.5	24	103	16
ZD2611	1	MYb71	5	24	113	12
ZD2611	2	MYb71	5	24	101	9
ZD2611	3	MYb71	5	24	104	2
ZD2611	1	MYb71	50	24	141	8
ZD2611	2	MYb71	50	24	80	3
ZD2611	3	MYb71	50	24	125	13

## Sheet: Figure1-FigureSupplement1B
Strain	Plate	Bacteria	Treatment	Time	GFP.Pos	GFP.Neg
ZD2611	1	MYb71	Susceptibility	24	111	7
ZD2611	2	MYb71	Susceptibility	24	127	3
ZD2611	3	MYb71	Susceptibility	24	104	4
ZD2611	1	MYb71	Early Transmission	24	5	78
ZD2611	2	MYb71	Early Transmission	24	5	104
ZD2611	3	MYb71	Early Transmission	24	5	116

## Sheet: Figure1-FigureSupplement1C
Strain	Plate	Bacteria	Treatment	Time	GFP.Pos	GFP.Neg
ZD2611	1	MYb71	Susceptibility	24	51	3
ZD2611	2	MYb71	Susceptibility	24	68	0
ZD2611	3	MYb71	Susceptibility	24	52	0
ZD2611	1	MYb71	Early Transmission	24	5	63
ZD2611	2	MYb71	Early Transmission	24	5	55
ZD2611	3	MYb71	Early Transmission	24	6	69

## Sheet: Figure1-FigureSupplement1D
Strain	Plate	Bacteria	Treatment	Time	GFP.Pos	GFP.Neg
ZD2611	1	MYb71	Susceptibility	24	27	6
ZD2611	2	MYb71	Susceptibility	24	30	4
ZD2611	3	MYb71	Susceptibility	24	32	3
ZD2611	1	MYb71	Early Transmission	24	5	48
ZD2611	2	MYb71	Early Transmission	24	5	64
ZD2611	3	MYb71	Early Transmission	24	5	45

## Sheet: Figure1-FigureSupplement2
Date	ID50	Notes
2021-08-17	1.49	ID50 assay with MYb11/MYb71
2021-09-14	2.21	ID50 assay with MYb11/MYb71
2021-12-11	3	ID50 assay with MYb11/MYb71
2022-01-22	6.17	ID50 assay with MYb11/MYb71
2022-06-25	10.79	Dose testing
2022-08-02	7.55	Dose testing
2022-08-05	4.75	Dose testing
2022-09-04	2.09	Dose testing
2022-09-25	4.23	Dose testing
2022-11-18	2.14	Dose testing
2022-12-10	9.34	Dose testing
2022-12-10	2.61	Dose testing
2022-12-14	1.04	Dose testing
2022-12-14	0.49	Dose testing
2023-01-26	5.07	Dose testing
2023-01-26	4.12	Dose testing
2023-02-22	3.16	Dose testing
2023-02-17	5.83	Dose testing
2023-02-21	3.06	Dose testing
2023-03-04	0.43	Dose testing
2023-03-28	0.27	Dose testing
2023-03-29	0.48	Dose testing
2023-05-15	2.43	Dose testing

## Sheet: Figure1-FigureSupplement3A
Strain	Plate	Bacteria	Dose	Time	GFP.Pos	GFP.Neg
ZD2611	1	OP50	0	24	NA	NA
ZD2611	2	OP50	0	24	NA	NA
ZD2611	3	OP50	0	24	0	118
ZD2611	1	OP50	0.1	24	2	148
ZD2611	2	OP50	0.1	24	6	153
ZD2611	3	OP50	0.1	24	NA	NA
ZD2611	1	OP50	0.25	24	7	115
ZD2611	2	OP50	0.25	24	6	111
ZD2611	3	OP50	0.25	24	NA	NA
ZD2611	1	OP50	0.5	24	24	136
ZD2611	2	OP50	0.5	24	11	96
ZD2611	3	OP50	0.5	24	NA	NA
ZD2611	1	OP50	1	24	29	146
ZD2611	2	OP50	1	24	46	148
ZD2611	3	OP50	1	24	NA	NA
ZD2611	1	OP50	2.5	24	41	83
ZD2611	2	OP50	2.5	24	25	100
ZD2611	3	OP50	2.5	24	NA	NA
ZD2611	1	OP50	5	24	81	58
ZD2611	2	OP50	5	24	92	80
ZD2611	3	OP50	5	24	NA	NA
ZD2611	1	OP50	10	24	37	6
ZD2611	2	OP50	10	24	121	7
ZD2611	3	OP50	10	24	101	30
ZD2611	1	OP50	25	24	81	7
ZD2611	2	OP50	25	24	175	7
ZD2611	3	OP50	25	24	115	4
ZD2611	1	OP50	50	24	184	11
ZD2611	2	OP50	50	24	167	11
ZD2611	3	OP50	50	24	108	3
ZD2611	1	OP50	100	24	205	4
ZD2611	2	OP50	100	24	161	1
ZD2611	3	OP50	100	24	194	2
ZD2611	1	MYb11	0	24	NA	NA
ZD2611	2	MYb11	0	24	NA	NA
ZD2611	3	MYb11	0	24	0	168
ZD2611	1	MYb11	0.1	24	0	123
ZD2611	2	MYb11	0.1	24	2	178
ZD2611	3	MYb11	0.1	24	NA	NA
ZD2611	1	MYb11	0.25	24	0	178
ZD2611	2	MYb11	0.25	24	0	154
ZD2611	3	MYb11	0.25	24	NA	NA
ZD2611	1	MYb11	0.5	24	3	83
ZD2611	2	MYb11	0.5	24	2	167
ZD2611	3	MYb11	0.5	24	NA	NA
ZD2611	1	MYb11	1	24	3	187
ZD2611	2	MYb11	1	24	1	224
ZD2611	3	MYb11	1	24	NA	NA
ZD2611	1	MYb11	2.5	24	4	124
ZD2611	2	MYb11	2.5	24	5	105
ZD2611	3	MYb11	2.5	24	NA	NA
ZD2611	1	MYb11	5	24	4	157
ZD2611	2	MYb11	5	24	4	153
ZD2611	3	MYb11	5	24	NA	NA
ZD2611	1	MYb11	10	24	8	73
ZD2611	2	MYb11	10	24	5	150
ZD2611	3	MYb11	10	24	3	109
ZD2611	1	MYb11	25	24	12	91
ZD2611	2	MYb11	25	24	10	178
ZD2611	3	MYb11	25	24	17	69
ZD2611	1	MYb11	50	24	36	105
ZD2611	2	MYb11	50	24	26	200
ZD2611	3	MYb11	50	24	42	102
ZD2611	1	MYb11	100	24	48	183
ZD2611	2	MYb11	100	24	85	153
ZD2611	3	MYb11	100	24	61	147
ZD2611	1	MYb71	0	24	NA	NA
ZD2611	2	MYb71	0	24	NA	NA
ZD2611	3	MYb71	0	24	2	101
ZD2611	1	MYb71	0.1	24	7	98
ZD2611	2	MYb71	0.1	24	8	54
ZD2611	3	MYb71	0.1	24	NA	NA
ZD2611	1	MYb71	0.25	24	26	27
ZD2611	2	MYb71	0.25	24	38	50
ZD2611	3	MYb71	0.25	24	NA	NA
ZD2611	1	MYb71	0.5	24	81	85
ZD2611	2	MYb71	0.5	24	56	75
ZD2611	3	MYb71	0.5	24	NA	NA
ZD2611	1	MYb71	1	24	100	48
ZD2611	2	MYb71	1	24	113	23
ZD2611	3	MYb71	1	24	NA	NA
ZD2611	1	MYb71	2.5	24	121	48
ZD2611	2	MYb71	2.5	24	123	24
ZD2611	3	MYb71	2.5	24	NA	NA
ZD2611	1	MYb71	5	24	33	5
ZD2611	2	MYb71	5	24	142	11
ZD2611	3	MYb71	5	24	166	28
ZD2611	1	MYb71	10	24	89	12
ZD2611	2	MYb71	10	24	130	13
ZD2611	3	MYb71	10	24	160	14
ZD2611	1	MYb71	25	24	116	8
ZD2611	2	MYb71	25	24	151	7
ZD2611	3	MYb71	25	24	143	5
ZD2611	1	MYb71	50	24	165	9
ZD2611	2	MYb71	50	24	224	7
ZD2611	3	MYb71	50	24	155	4
ZD2611	1	MYb71	100	24	195	4
ZD2611	2	MYb71	100	24	275	7
ZD2611	3	MYb71	100	24	214	4

## Sheet: Figure1-FigureSupplement3B
Strain	Plate	Bacteria	Dose	Time	GFP.Pos	GFP.Neg
ZD2611	1	OP50	0	24	0	58
ZD2611	2	OP50	0	24	0	45
ZD2611	3	OP50	0	24	0	37
ZD2611	1	OP50	0.1	24	0	64
ZD2611	2	OP50	0.1	24	0	83
ZD2611	3	OP50	0.1	24	3	91
ZD2611	1	OP50	0.25	24	3	60
ZD2611	2	OP50	0.25	24	5	69
ZD2611	3	OP50	0.25	24	2	22
ZD2611	1	OP50	0.5	24	8	52
ZD2611	2	OP50	0.5	24	15	76
ZD2611	3	OP50	0.5	24	13	62
ZD2611	1	OP50	1	24	20	97
ZD2611	2	OP50	1	24	15	35
ZD2611	3	OP50	1	24	10	28
ZD2611	1	OP50	2.5	24	20	49
ZD2611	2	OP50	2.5	24	16	30
ZD2611	3	OP50	2.5	24	18	45
ZD2611	1	OP50	5	24	62	43
ZD2611	2	OP50	5	24	49	45
ZD2611	3	OP50	5	24	23	14
ZD2611	1	OP50	10	24	66	9
ZD2611	2	OP50	10	24	64	12
ZD2611	3	OP50	10	24	45	6
ZD2611	1	OP50	25	24	79	4
ZD2611	2	OP50	25	24	86	6
ZD2611	3	OP50	25	24	79	7
ZD2611	1	OP50	50	24	80	6
ZD2611	2	OP50	50	24	33	3
ZD2611	3	OP50	50	24	38	1
ZD2611	1	OP50	100	24	84	4
ZD2611	2	OP50	100	24	77	1
ZD2611	3	OP50	100	24	79	2
ZD2611	1	MYb11	0	24	0	68
ZD2611	2	MYb11	0	24	0	90
ZD2611	3	MYb11	0	24	0	29
ZD2611	1	MYb11	0.1	24	1	58
ZD2611	2	MYb11	0.1	24	1	69
ZD2611	3	MYb11	0.1	24	0	61
ZD2611	1	MYb11	0.25	24	0	74
ZD2611	2	MYb11	0.25	24	0	93
ZD2611	3	MYb11	0.25	24	0	65
ZD2611	1	MYb11	0.5	24	0	111
ZD2611	2	MYb11	0.5	24	0	46
ZD2611	3	MYb11	0.5	24	0	67
ZD2611	1	MYb11	1	24	0	107
ZD2611	2	MYb11	1	24	2	82
ZD2611	3	MYb11	1	24	2	89
ZD2611	1	MYb11	2.5	24	2	59
ZD2611	2	MYb11	2.5	24	2	59
ZD2611	3	MYb11	2.5	24	0	50
ZD2611	1	MYb11	5	24	3	66
ZD2611	2	MYb11	5	24	4	60
ZD2611	3	MYb11	5	24	2	68
ZD2611	1	MYb11	10	24	3	67
ZD2611	2	MYb11	10	24	5	100
ZD2611	3	MYb11	10	24	11	98
ZD2611	1	MYb11	25	24	16	51
ZD2611	2	MYb11	25	24	17	77
ZD2611	3	MYb11	25	24	8	51
ZD2611	1	MYb11	50	24	19	74
ZD2611	2	MYb11	50	24	25	74
ZD2611	3	MYb11	50	24	15	61
ZD2611	1	MYb11	100	24	25	87
ZD2611	2	MYb11	100	24	29	90
ZD2611	3	MYb11	100	24	7	40
ZD2611	1	MYb71	0	24	0	54
ZD2611	2	MYb71	0	24	0	83
ZD2611	3	MYb71	0	24	0	34
ZD2611	1	MYb71	0.1	24	36	62
ZD2611	2	MYb71	0.1	24	38	63
ZD2611	3	MYb71	0.1	24	26	43
ZD2611	1	MYb71	0.25	24	33	28
ZD2611	2	MYb71	0.25	24	56	63
ZD2611	3	MYb71	0.25	24	48	54
ZD2611	1	MYb71	0.5	24	95	22
ZD2611	2	MYb71	0.5	24	99	15
ZD2611	3	MYb71	0.5	24	66	7
ZD2611	1	MYb71	1	24	103	21
ZD2611	2	MYb71	1	24	64	10
ZD2611	3	MYb71	1	24	52	10
ZD2611	1	MYb71	2.5	24	115	20
ZD2611	2	MYb71	2.5	24	74	9
ZD2611	3	MYb71	2.5	24	76	9
ZD2611	1	MYb71	5	24	126	16
ZD2611	2	MYb71	5	24	75	3
ZD2611	3	MYb71	5	24	91	9
ZD2611	1	MYb71	10	24	120	6
ZD2611	2	MYb71	10	24	83	5
ZD2611	3	MYb71	10	24	45	4
ZD2611	1	MYb71	25	24	100	3
ZD2611	2	MYb71	25	24	79	1
ZD2611	3	MYb71	25	24	78	4
ZD2611	1	MYb71	50	24	92	0
ZD2611	2	MYb71	50	24	91	1
ZD2611	3	MYb71	50	24	87	1
ZD2611	1	MYb71	100	24	82	2
ZD2611	2	MYb71	100	24	99	1
ZD2611	3	MYb71	100	24	61	2

[truncated: 49 more sheets: Figure1-FigureSupplement4A, Figure1-FigureSupplement4B, Figure2A, Figure2B, Figure2C, Figure2-FigureSupplement1A, Figure2-FigureSupplement1B, Figure2-FigureSupplement2, Figure3A, Figure3B-C, Figure3D-E, Figure3F, Figure4B, Figure4C, Figure4D, Figure4E, Figure4F, Figure4-FigureSupplement1A, Figure4-FigureSupplement1B, Figure4-FigureSupplement2A …]
