# Supplementary material for: Bacteria are a major determinant of Orsay virus transmission and infection in Caenorhabditis elegans
Source: eLife. 2024 Jul 11;12:RP92534. doi: 10.7554/eLife.92534 (PMC11239179; doi:10.7554/eLife.92534)
Supplement: Supplementary file 2. [file elife-92534-supp2.xlsx]

## Sheet: C. elegans Genotyping
Label	Target	Reference	Sequence
oBGV_45(ne219_1F)	rde-1(ne219)		ggaagaaatgcaaaaaagtac
oBGV_46(ne219_1R)	rde-1(ne219)	Asad, Aw, and Timmons 2012	ttagggtattttctttgtag

## Sheet: qPCR
Label	Target	Purpose	Reference	Sequence
GW194	RNA1 Orsay virus F	qPCR		acctcacaactgccatctaca
GW195	RNA1 Orsay virus R	qPCR	Felix et al. 2011	GACGCTTCCAAGATTGGTATT
oTB17	RNA2 Orsay virus F	qPCR		accacgtgtggacccataaa
oTB18	RNA2 Orsay virus R	qPCR	Ashe et al. 2013	gatcggttcgtcttggaatg
snb-1-1	Host Snb-1	qPCR		GCTCAGGTTGATGAAGTCGTC
snb-1-2	Host Snb-1	qPCR		GGTGGCCGCAGATTTCTC

## Sheet: P. lurida MYb11 KO Generation
Label	Target	Sequence
pexg2_vec_F	Vector amplification for pseudomonas Kos	ctgaatggcgaatggcgagc
pexg2_vec_R	Vector amplification for pseudomonas Kos	taatacggttatccacagaatcagggg
Vector_Seq_F	Sequencing into vector insertion site	gccacctctgacttgagcgtc
Vector_Seq_R	Sequencing into vector insertion site	cagaccgcttctgcgttctg
11_gacA_5F	gacA KO 5' Homology arm F	cccctgattctgtggataaccgtattaATTGTCGCAGAAAGTCTTCGGTG
11_gacA_5R	gacA KO 5' Homology arm R	ATGCCGTGGCGATGGTCATCGACTACTAGCACCC
11_gacA_3F	gacA KO 3' Homology arm F	CGATGACCATCGCCACGGCATGGTG
11_gacA_3R	gacA KO 3' Homology arm R	gctcgccattcgccattcagTGTCTTCGCACTGACGCACAAAAA
11_gacA_KO_seq_5	Mutant KO confirmation sequencing 5'	CTCGGGGTGTGCCAAATAGG
11_gacA_KO_Seq_3	Mutant KO confirmation sequencing 3'	CCGCGTGCGGTTCTTGTAGAAG
11_kinB_5F	kinB KO 5' Homology arm F	ggataaccgtattaCGACGAGATCGGCGACTTTC
11_kinB_5R	kinB KO 5' Homology arm R	ATAGAATTGAGTACCCCGAGTGCGCAGCTTCATC
11_kinB_3F	kinB KO 3' Homology arm F	GCTGCGCACTCGGGGTACTCAATTCTATATGGCGCTGCC
11_kinB_3R	kinB KO 3' Homology arm R	ccattcgccattcagGGCATTGCTCACCCACGG
11_kinB_KO_seq_5	Mutant KO confirmation sequencing 5'	GGCCAGTGAGAGCACCTTGG
11_kinB_KO_seq_3	Mutant KO confirmation sequencing 3'	GCATACAGTTCGTGGTCGTGC
11_prpC_5F	prpC KO 5' Homology arm F	ctgtggataaccgtattaGGAAATGGTCGACCGCATCAAG
11_prpC_5R	prpC KO 5' Homology arm R	CACGAACTTGCGCTGGGCGCCACTCAATACTTTTGCTTC
11_prpC_3F	prpC KO 3' Homology arm F	GTATTGAGTGGCGCCCAGCGCAAGTTCGTGCCAATC
11_prpC_3R	prpC KO 3' Homology arm R	ccattcgccattcagGGGTCACCGCCTTGCAGG
11_prpC_KO_seq_5	Mutant KO confirmation sequencing 5'	CGCCAAGCGTTGCGGTCATC
11_prpC_KO_seq_3	Mutant KO confirmation sequencing 3'	CGACGATCAGTTGGGTCGGC
11_ptsP_5F	ptsP KO 5' Homology arm F	gtggataaccgtattaGAGGTAATCGCCCCAGGCG
11_ptsP_5R	ptsP KO 5' Homology arm R	CCCTGGGTTGATCATCTGGACGATCTTGCGCAGC
11_ptsP_3F	ptsP KO 3' Homology arm F	GCGCAAGATCGTCCAGATGATCAACCCAGGGTCGGC
11_ptsP_3R	ptsP KO 3' Homology arm R	ccattcgccattcagCGCCGGTCGCGACCAG
11_ptsP_KO_seq_5	Mutant KO confirmation sequencing 5'	CGGGTGTGGGTAGAGTGGGG
11_ptsP_KO_seq_3	Mutant KO confirmation sequencing 3'	CCGGGTCGAGAATCCCGCG

## Sheet: P. aeruginosa Genotyping
Label	Target	Sequence
14_pelA_5'	Mutant KO confirmation for PA14 pelA	gtatcgaccttgccgcgtagg
14_pelA_3'	Mutant KO confirmation for PA14 pelA	gagagcgaccggcagcag
14_rhlR_5'	Mutant KO/sequencing for PA14 rhlR	cgggccaattctgctgtgatg
14_rhlR_3'	Mutant KO/sequencing for PA14 rhlR	ggaggatgaacggcaggcaac
14_rhlI_5'	Mutant KO/sequencing for PA14 rhlI	ggcacgacacggggacttg
14_rhlI_3'	Mutant KO/sequencing for PA14 rhlI	gtgcgcgaaacggctgac
14_pqsE_5'	Mutant KO confirmation for PA14 pqsE	gcggcgctgtaccgtaaac
14_pqsE_3'	Mutant KO confirmation for PA14 pqsE	cgatcgccgcaatggatgtc
01_pslA_5-2	Mutant KO confirmatin for psl	cactcaatggactgcccgtgatc
01_pslA_3	Mutant KO confirmatin for psl	ggcatgctctcccgggaaac
01_pslB_3	Mutant KO confirmatin for psl	cgttgcgcgtgggaatgac
01_pslC_3	Mutant KO confirmatin for psl	catgagggagcacttcctgtagg
01_pslA_5'	Mutant KO confirmation for PA01 pel operon	caccgccttgctcttccc
01_pslD_5'	Mutant KO confirmation for PA01 pel/pelD operon	catgacctacaggaagtgctccc
01_pslD_5'_REV	Mutant KO confirmation for PA01 pel operon	gggagcacttcctgtaggtcatg
01_pslD_3'	Mutant KO confirmation for PA01 pel/pelD operon	cgaatttctatcatggcgatgtcgc
01_pslH_5'	Mutant KO confirmation for PA01 pel operon	gccacccatgcgtattctctg
01_pslG_3'	Mutant KO confirmation for PA01 pel operon	cagagaatacgcatgggtggc
01_pslL_3'	Mutant KO confirmation for PA01 pel operon	gggagacgggaggggaaagg
01_pslN_3'	Mutant KO confirmation for PA01 pel operon	ctgcgcaaggaactggaagc
lasI_5		cgtttcttcgagcctagcaaggg
lasI_3		gggtcggactcgctttacagc
lasR_5		ctgactggacatcttcaggggtcg
lasR_3		gcggcagtcgtttcgagaatg
gacA_5	Mutant KO confirmation sequencing 5' both PA01/PA14	ccgttcgatgccgtcgaatg
gacA_3	Mutant KO confirmation sequencing 3' both PA01/PA14	gtttccacctgggcgatgcg
14_glnK_tn_F		gcactgaagcagtaccggtg
14_glnK_tn_R		gatacagctcggtgtggccc
14_fabF1_tn_F		ggcgcaaccccgtgaaatg
14_fabF1_tn_R		cgccgatacgctcacgattg
14_kinB_tn_F		gacgggtcctggaacaggg
14_kinB_tn_R		cgaaaccgatcagcaggatgg
14_ptsP_tn_F		gcaccgaagtgccgttcatg
14_ptsP_tn_R		cagtccttcgctggccttg
14_clpA_tn_F		ccaaacgccatgaattcatgacgg
14_clpA_tn_R		ccggtcacttcgcgcttg
14_prpC_tn_F		catcgactgcaacagcgacg
14_prpC_tn_R		cgagcatcttcagcagctcg
14_gshB_tn_F		gatgcgcgccaggcagtag
14_gshB_tn_R		ccacgcagttcacccagtg
oBGV_123(rsmN_R)	rsmN (previoulsy rsmF?) PA01 reverse	gaacgacgggcgcatctgg
oBGV_124(pqsA_F)	pqsA PA01 forward	ctacgaagcccgtggttcttctcc
oBGV_125(pqsA_R)	pqsA PA01 reverse	cagacacacataggatgggggcag
oBGV_126(pqsA_IntF)	pqsA PA01 internal	gctcggccaggtatcgtcgag
oBGV_127(pslD_F)	pslD PA01 forward	gcgccgcatcagcatgtttc
oBGV_128(pslD_R)	pslD PA01 forward	ctggtagatgaacagcaggcgc
